# Supplementary material for: G6PD and ACSL3 are synthetic lethal partners of NF2 in Schwann cells
Source: PubMed Central journal article supplement (PMC11180199; doi:10.1038/s41467-024-49298-7), 2024-06-15
Supplement: 41467_2024_49298_MOESM1_ESM.pdf [file 41467_2024_49298_MOESM1_ESM.pdf]

## Supplementary Information

### **G6PD and ACSL3 are synthetic lethal partners of NF2 in Schwann cells**

Athena Kyrkou, Robert Valla et al.

#### **Contents**

|                                                      |       |
|------------------------------------------------------|-------|
| Supplementary Figures .....                          | p. 2  |
| Uncropped Immunoblots of Supplementary Figures ..... | p. 19 |
| Supplementary Information References .....           | p. 34 |

# Supplementary Figure 1

**A**

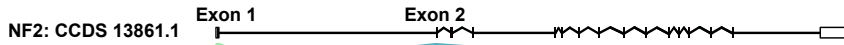

| NF2 KO Clone #1 : targeting Exon 2 |                                                              |                       |     |
|------------------------------------|--------------------------------------------------------------|-----------------------|-----|
| DNA                                | Exon 2                                                       | sgNF2#11              | PAM |
| NF2WT                              | ACCTGGTTCTTTGGACTGCAGTACACAATCAAGGACACA                      | -GTGGCCTGGCTCAAAATGGA |     |
| NF2KO1allele#1                     | ACCTGGTTCTTTGGACTGCAGTACACAATCAAGGACAACAGTGGCCTGGCTCAAAATGGA |                       |     |
| NF2KO1allele#2                     | ACCTGGTTCTTTGGACTGCAGTACACAATCAAGGAC---                      | AGTGGCCTGGCTCAAAATGGA |     |
| *****                              |                                                              |                       |     |
| Protein                            |                                                              |                       |     |
| NF2WT                              | MKWKGKDLFDLVCRTLGLRETWFFGLQYTIKDTVAVLKMDDKVLHDHVS-           |                       |     |
| NF2KO1allele#1                     | MKWKGKDLFDLVCRTLGLRETWFFGLQYTIKDNSGLAQNGQEGWARTR*            |                       |     |
| NF2KO1allele#2                     | MKWKGKDLFDLVCRTLGLRETWFFGLQYTIKD-SGLAQNGQEGWARTR*            |                       |     |
| *****                              |                                                              |                       |     |

  

| NF2 KO Clone #2 : targeting Exon 1 |                                                                       |         |     |
|------------------------------------|-----------------------------------------------------------------------|---------|-----|
| DNA                                | Exon 1                                                                | sgNF2#6 | PAM |
| NF2KO2#allele#2                    | ACGTTTACCCTGAGGATCGTCACCATGGACGCCGAGATGGAGTTTCATTTTTCGAGGTAAC         |         |     |
| NF2WT                              | ACGTTTACCCTGAGGATCGTCACCATGGACGCCGAGATGGAGTTCAA--TTGCGAGGTAAC         |         |     |
| NF2KO2#allele#1                    | ACGTTTACCCTGAGGATCGTCACCATGGACGCCGAGATGGAGTTCA--TTGCGAGGTAAC          |         |     |
| *****                              |                                                                       |         |     |
| Protein                            |                                                                       |         |     |
| NF2WT                              | MAGAIASRMSFSSLKRKQPKFTVRIVTMDAEMEFNCEMKWKGKDLFDLVCRTLGLRETWFFGLQYTIKD |         |     |
| NF2KO2#allele#1                    | MAGAIASRMSFSSLKRKQPKFTVRIVTMDAEMEFIAI*-----                           |         |     |
| NF2KO2#allele#2                    | MAGAIASRMSFSSLKRKQPKFTVRIVTMDAEMEFILRGNRPAAPAAVAVT-VEVEAREVLFV-SSYGC* |         |     |
| *****                              |                                                                       |         |     |

**B**

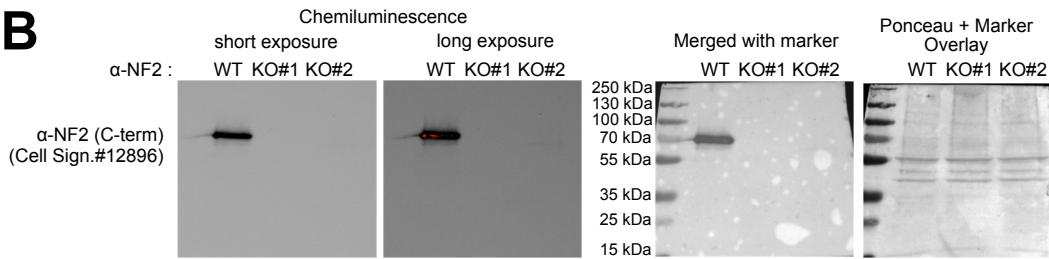

**C**

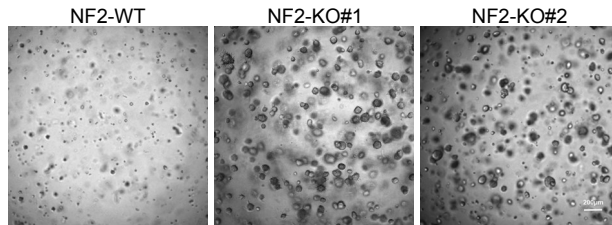

**E**

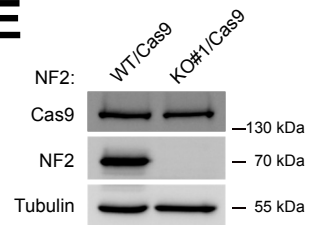

**D**

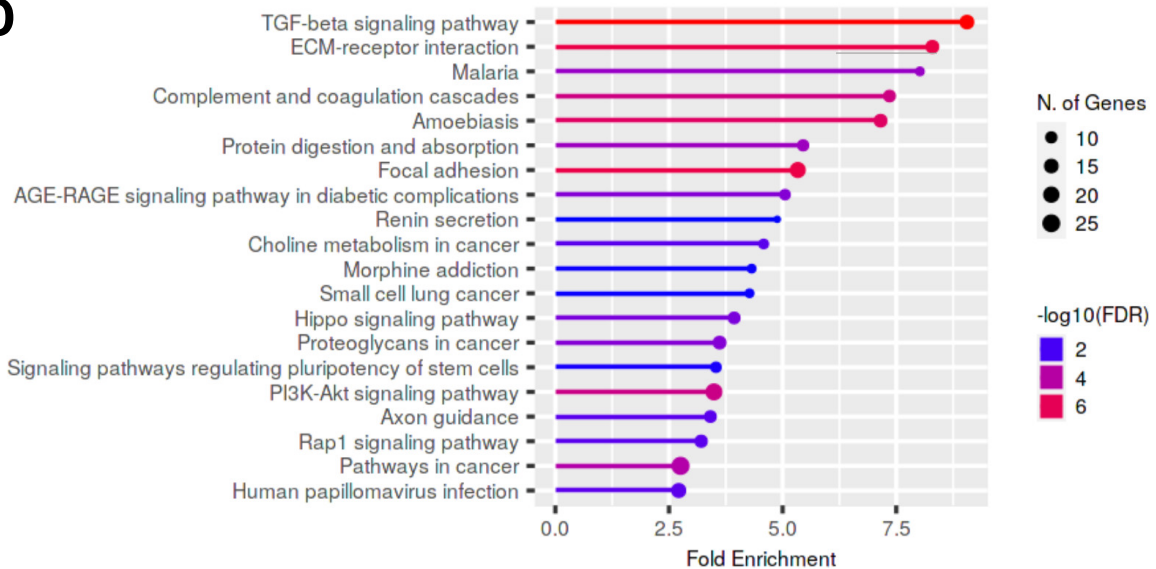

**Supplementary Figure 1: Characterization of NF2 KO Schwann cell lines.**

**(A)** Molecular characterization of the two NF2 KO Schwann cell lines (DNA and resulting protein truncations) targeting exons 1 and 2.

**(B)** NF2-KO cells do not express a truncated form of NF2. Immunoblot of NF2-WT and NF2-KO cells with an antibody that detects the c-terminal region of NF2.

**(C)** NF2-KO Schwann cells, but not the NF2-WT parental line, can form anchorage-independent clones in soft agar (7 days).

**(D)** Gene Ontology enrichment on genes differentially expressed in NF2-KO#1 cells compared to NF2-WT cells ( $|\log_2FC| > 2$  and Benjamini-Hochberg  $p < 0.01$ ), analysed with ShinyGo <sup>1</sup>.

**(E)** Immunoblot analysis of Cas9 expression in the cell lines that were used for the synthetic lethality screen.

Source data are provided as a Source Data file.

# Supplementary Figure 2

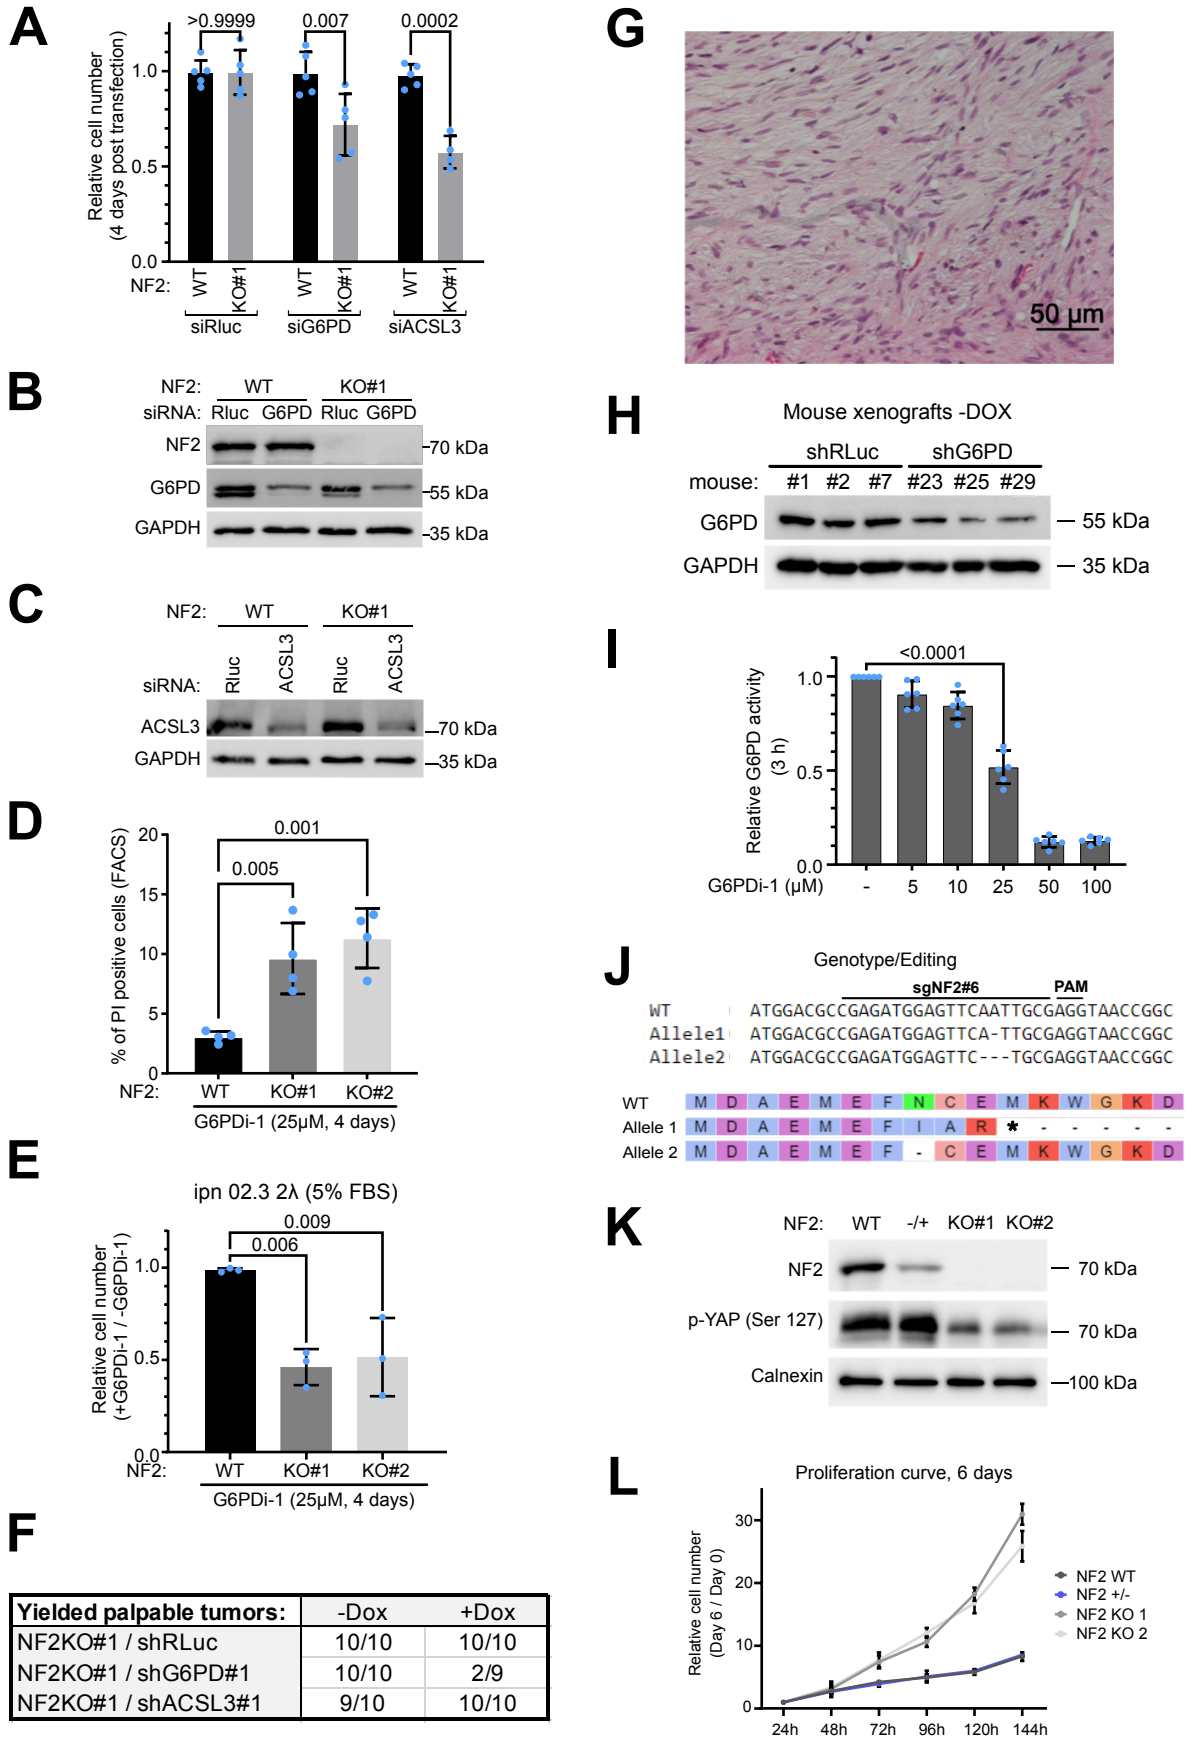

**Supplementary Figure 2: Support to main figure 2.**

**(A-C)** siRNA-mediated knockdown of G6PD or ACSL3 causes synthetic lethality with NF2 loss-of-function in Schwann cells. (A) Relative cell number, assayed by CellTiter-Glo, normalized to control siRLuc. Dots = biological replicates. Bars = mean  $\pm$  SD. Significance by two-way ANOVA and Tukey's multiple comparisons test. n=4 biological replicates. (B-C) Control immunoblots.

**(D)** Pharmacological inhibition of G6PD induces cell death of NF2-KO Schwann cells, assayed by flow cytometry as PI-positive cells 96hrs after treatment with G6PDi-1 (25 $\mu$ M). Bars = mean  $\pm$  SD. Significance by one-way ANOVA and Dunnett's multiple comparisons test. n=3 biological replicates.

**(E)** Inhibition of G6PD causes synthetic lethality with NF2 loss-of-function also in Schwann cells growing in culture conditions with reduced growth factor stimulation (5% FBS). Ratio of cell number +G6PDi-1 inhibitor normalized to the -inhibitor condition, assayed by CellTiter Glo. Bars = mean  $\pm$  SD. Significance by one-way ANOVA and Dunnett's multiple comparisons test. n=3 biological replicates.

**(F)** Tumor take rate for the indicated Schwann cell lines, either in the absence or presence of doxycycline in the drinking water to induce knockdown.

**(G)** High magnification histology image of the periphery of a G6PD-shRNA tumor - dox stained with hematoxylin and eosin.

**(H)** G6PD levels are reduced in mouse xenografts carrying the G6PD shRNA even without doxycycline. Shown are immunoblots on whole-tumor lysates from 3 randomly selected mice carrying xenografts of each genotype.

**(I)** A dose-response curve with G6PDi-1 reveals that 25 $\mu$ M G6PDi-1 causes roughly a 50% inhibition in G6PD activity. Dots = biological replicates. Bars = mean  $\pm$  SD. Significance by unpaired t-test. n=6 biological replicates.

**(J)** Molecular characterization of the "NF2-/+ " heterozygous Schwann cell line (DNA and resulting protein truncations). Allele 1 leads to a frameshift mutation and premature stop codon whereas allele 2 leads to loss of 1 amino acid.

**(K)** NF2-/+ cells have reduced NF2 protein levels but not reduced YAP phosphorylation, detected via immunoblotting with the indicated antibodies.

**(L)** NF2-/+ cells proliferate like NF2-wildtype cells, indicating that the remaining levels of NF2 in these cells are sufficient to provide full NF2 activity.

Source data are provided as a Source Data file.

# Supplementary Figure 3

## A

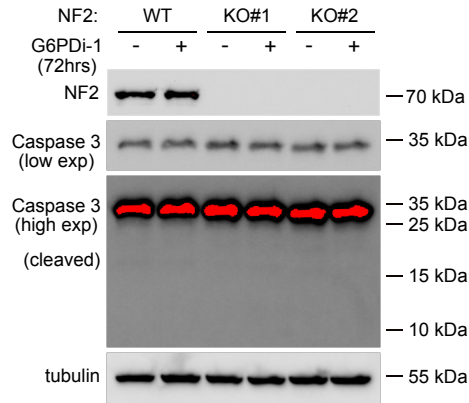

## B

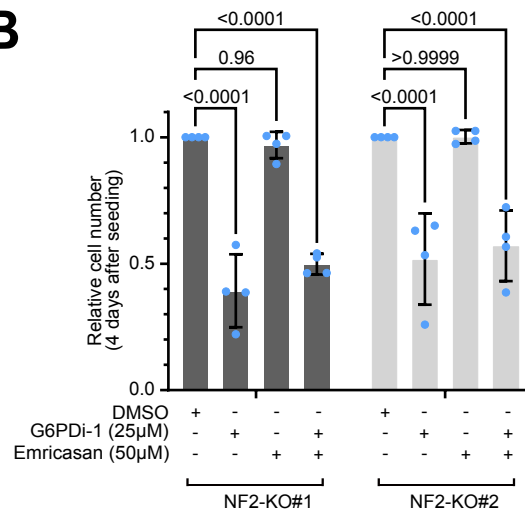

## C

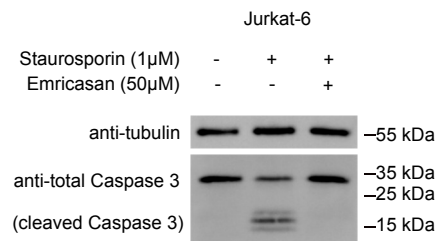

**Supplementary Figure 3: NF2-KO cells die in response to G6PD inhibition via a caspase-independent cell death mechanism.**

**(A)** NF2-KO cells treated with 25 $\mu$ M G6PDi-1, which induces cells death, does not lead to any visible caspase cleavage, detected by immunoblotting.

**(B)** Pan-caspase inhibitor Emricasan does not rescue reduced cell viability caused by G6PDi-1 in NF2-KO cells. Bars = mean  $\pm$  SD. Significance by two-way ANOVA and Sidak's multiple comparisons test n=4 biological replicates.

**(C)** 25 $\mu$ M Emricasan efficiently blocks cleavage of caspase 3 induced by treatment with staurosporin.

Source data are provided as a Source Data file.



# Supplementary Figure 4

**A**

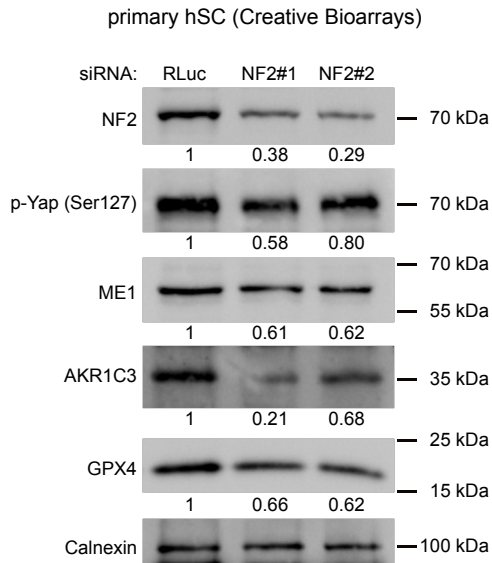

**B**

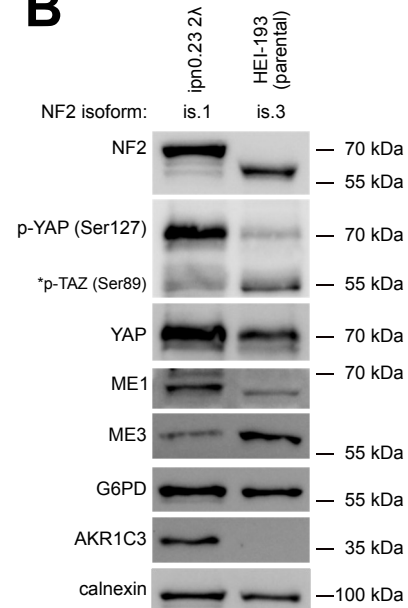

**C**

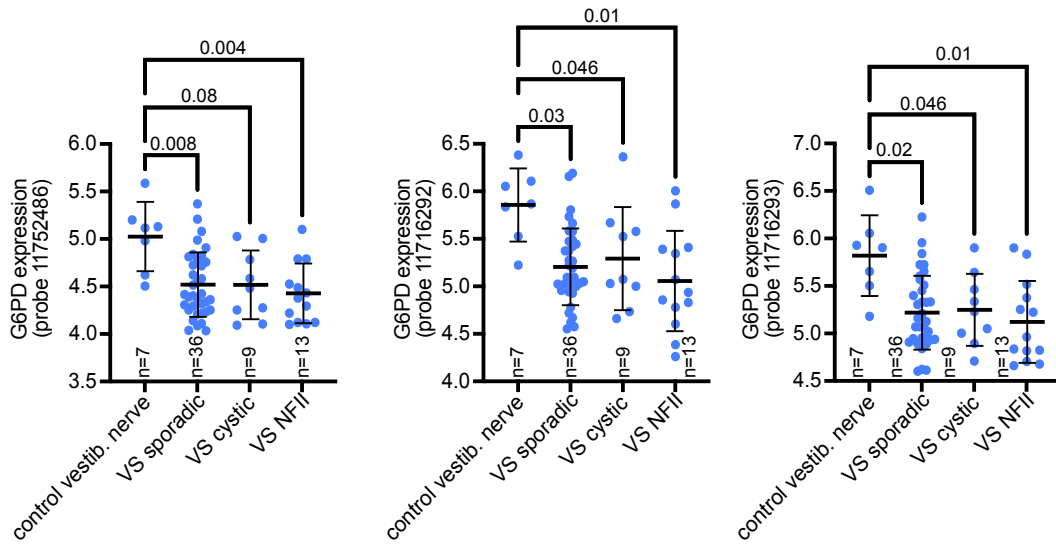

**Supplementary Figure 4: Knockdown of NF2 reduces ME1 and AKR1C3 protein levels also in primary Schwann cells.**

**(A)** Immunoblot analysis of indicated protein levels in primary Schwann cells 96hrs after siRNA-mediated knockdown of NF2 or RLuc (negative control). Numbers indicate protein levels normalized to calnexin.

**(B)** Compared to ipn ipn02.3 2λ cells, HEI-193 cells have expression of a hypomorphic "isoform 3" of NF2, reduced YAP phosphorylation, reduced ME1 levels and reduced AKR1C3 levels.

**(C)** G6PD levels are reduced in different types of vestibular schwannomas (VS: sporadic, cystic and NF2) compared to control vestibular nerve. Data are re-analyzed from <sup>2</sup>. Dots = individual patients. Bars = mean ± SD. Significance by Brown-Forsythe and Welch ANOVA and Dunnetts's multiple comparisons test. Source data are provided as a Source Data file.

## Supplementary Figure 5

**A**

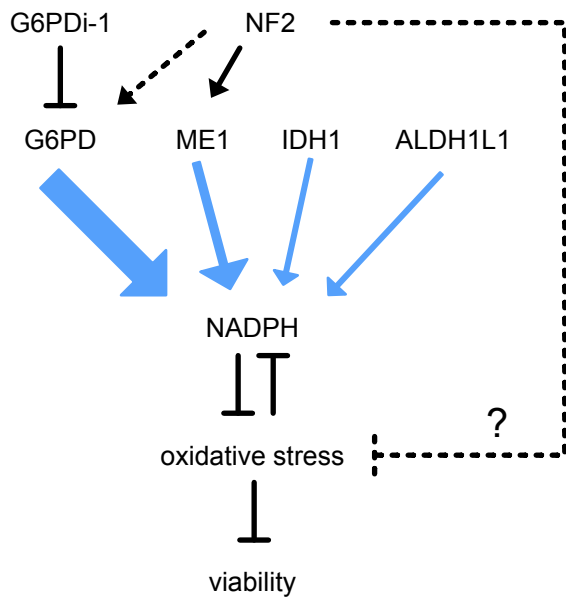

**B**

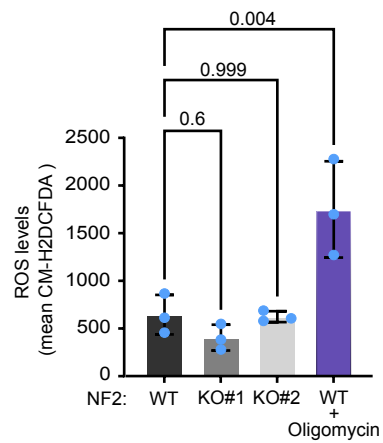

**C**

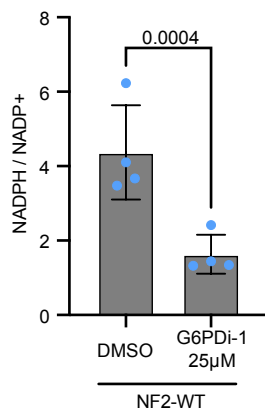

**D**

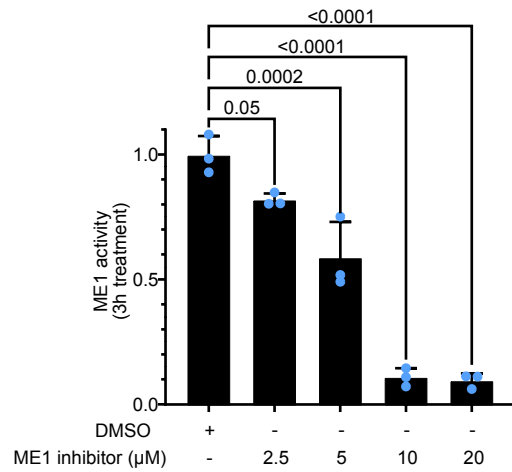

**Supplementary Figure 5: Support to main figure 5.**

**(A)** Mechanistic model for why inhibition of G6PD leads to lethality in NF2-KO cells. Loss of NF2 leads to a more oxidized cellular state in part due to reduced expression of NADPH-producing enzymes. As a result, NF2-KO cells rely more strongly on G6PD for NADPH production compared to NF2-WT cells. If G6PD is also inhibited pharmacologically in NF2-KO cells, then the cells die due to oxidative stress.

**(B)** NF2-KO Schwann cells do not have elevated basal ROS levels compared to isogenic NF2-WT cells. ROS levels assayed via flow cytometry using the ROS sensor CM-H2DCFDA (5 $\mu$ M-30min). Oligomycin (5 $\mu$ M-30min) was used as a positive control. Bars = mean  $\pm$  SD. Significance by one-way ANOVA and Dunnett's multiple comparisons test. n=3 biological replicates

**(C)** Pharmacological inhibition of G6PD in NF2-WT Schwann cells leads to lower levels of reduced NADPH normalized to NADP<sup>+</sup>. n=4 biological replicates. Bars = mean  $\pm$  SD. Significance by two-way ANOVA and Tukey's multiple comparisons test.

**(D)** Dose response curve with ME1 inhibitor identifies that 10 $\mu$ M ME1 inhibitor decreases ME1 enzymatic activity to the levels observed in NF2 KO cells (main Figure 4h). Results are normalized to enzymatic activity in wild type cells. Dots = biological replicates. Bars = mean  $\pm$  SD. Significance by two-way ANOVA and Tukey's multiple comparisons test. n=3 biological replicates.

Source data are provided as a Source Data file.

# Supplementary Figure 6

**A**

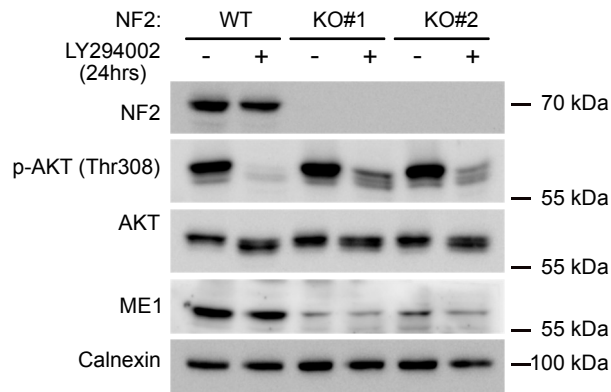

**B**

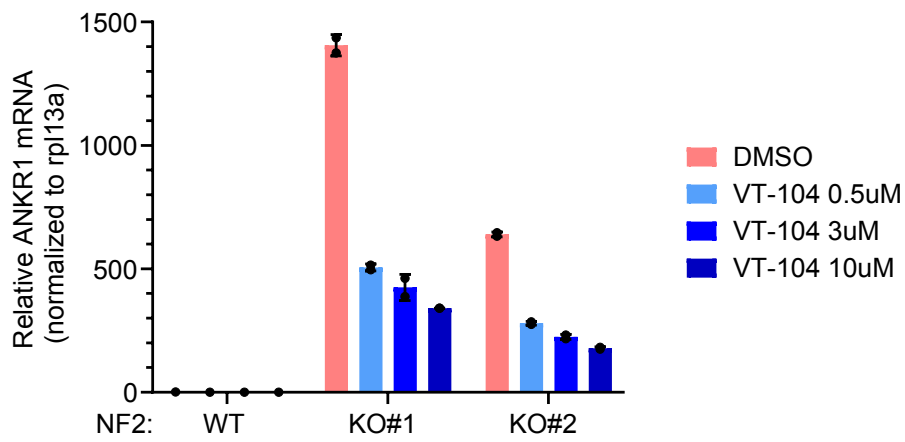

**C**

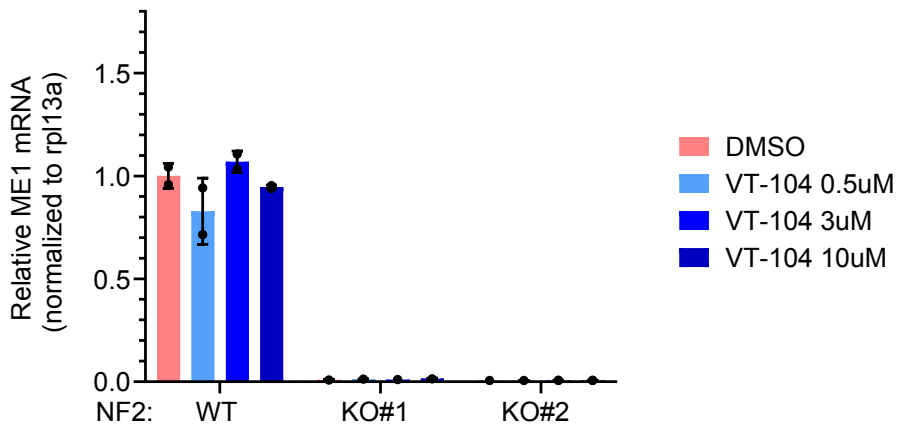

**D**

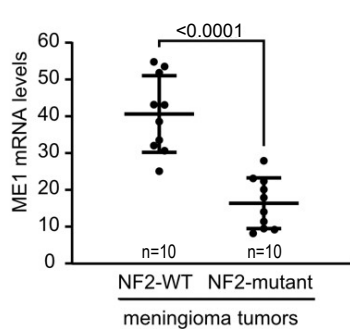

**E**

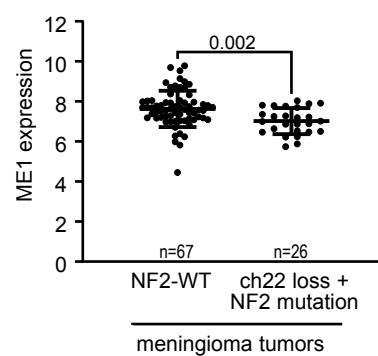

### **Supplementary Figure 6: Regulation of ME1 upon loss of NF2**

**(A)** Inhibition of the PI3K pathway with LY294002 (30  $\mu$ M, 24h) does not restore ME1 levels in the NF2-KO cells back to wildtype levels.

**(B-C)** Inhibition of TEAD transcription factors with VT-104 does not rescue the altered gene expression seen in NF2-KO cells back to NF2-WT levels. Cells were treated with the indicated concentrations of VT-104 for 6 h and then mRNA levels of ANKR1 (B) and ME1 (C) were measured by quantitative RT-PCR.

**(D-E)** ME1 mRNA levels are reduced in NF2 mutant meningiomas. (D) Re-analysis with GEO2R of data from <sup>3</sup>. Bars = mean  $\pm$  SD. Significance by t-test.

(E) Re-analysis with GEO2R of data from <sup>4</sup>. Significance by t-test.

Source data are provided as a Source Data file.

# Supplementary Figure 7

**A**

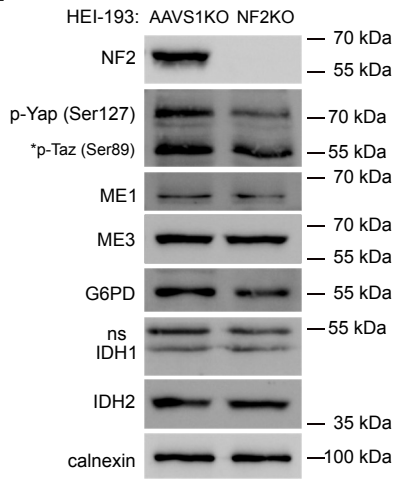

**B**

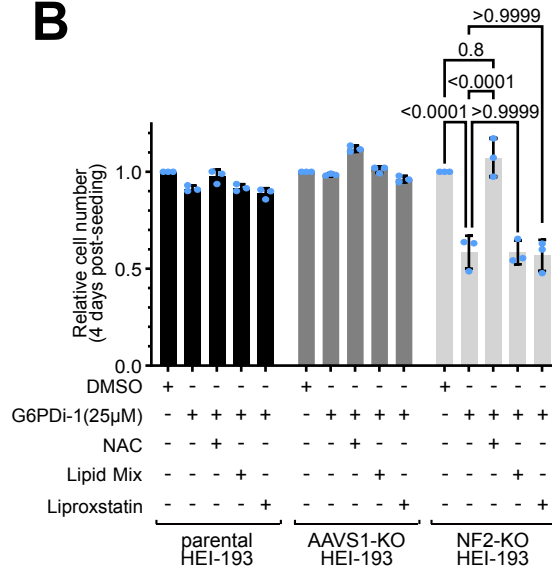

**C**

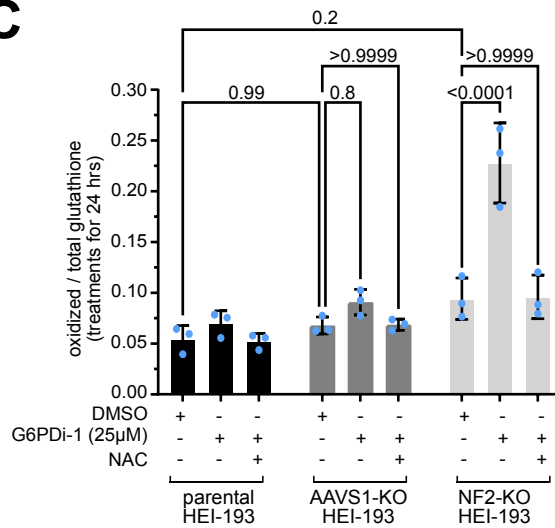

**Supplementary Figure 7: Knockout of NF2 in HEI-193 cells causes them to die upon G6PD inhibition**

**(A)** Knockout of NF2 in HEI-193 cells leads to reduced YAP phosphorylation but no further reduction in ME1 levels, which are already low (see Suppl. Fig. 4B).

**(B)** Pharmacological inhibition of G6PD with 25 $\mu$ M G6PDi-1 kills NF2-KO HEI-193 cells, and the lethality is rescued by NAC, indicating it is due to oxidative stress. Dots = biological replicates. Bars = mean  $\pm$  SD. Significance by two-way ANOVA and Tukey's multiple comparisons test. n=3 biological replicates.

**(C)** G6PD inhibition leads to oxidized glutathione in NF2-KO HEI-193 cells, and this is rescued by treatment with NAC. Dots = biological replicates. Bars = mean  $\pm$  SD. Significance by two-way ANOVA and Tukey's multiple comparisons test. n=3 biological replicates.

Source data are provided as a Source Data file.



# Supplementary Figure 8

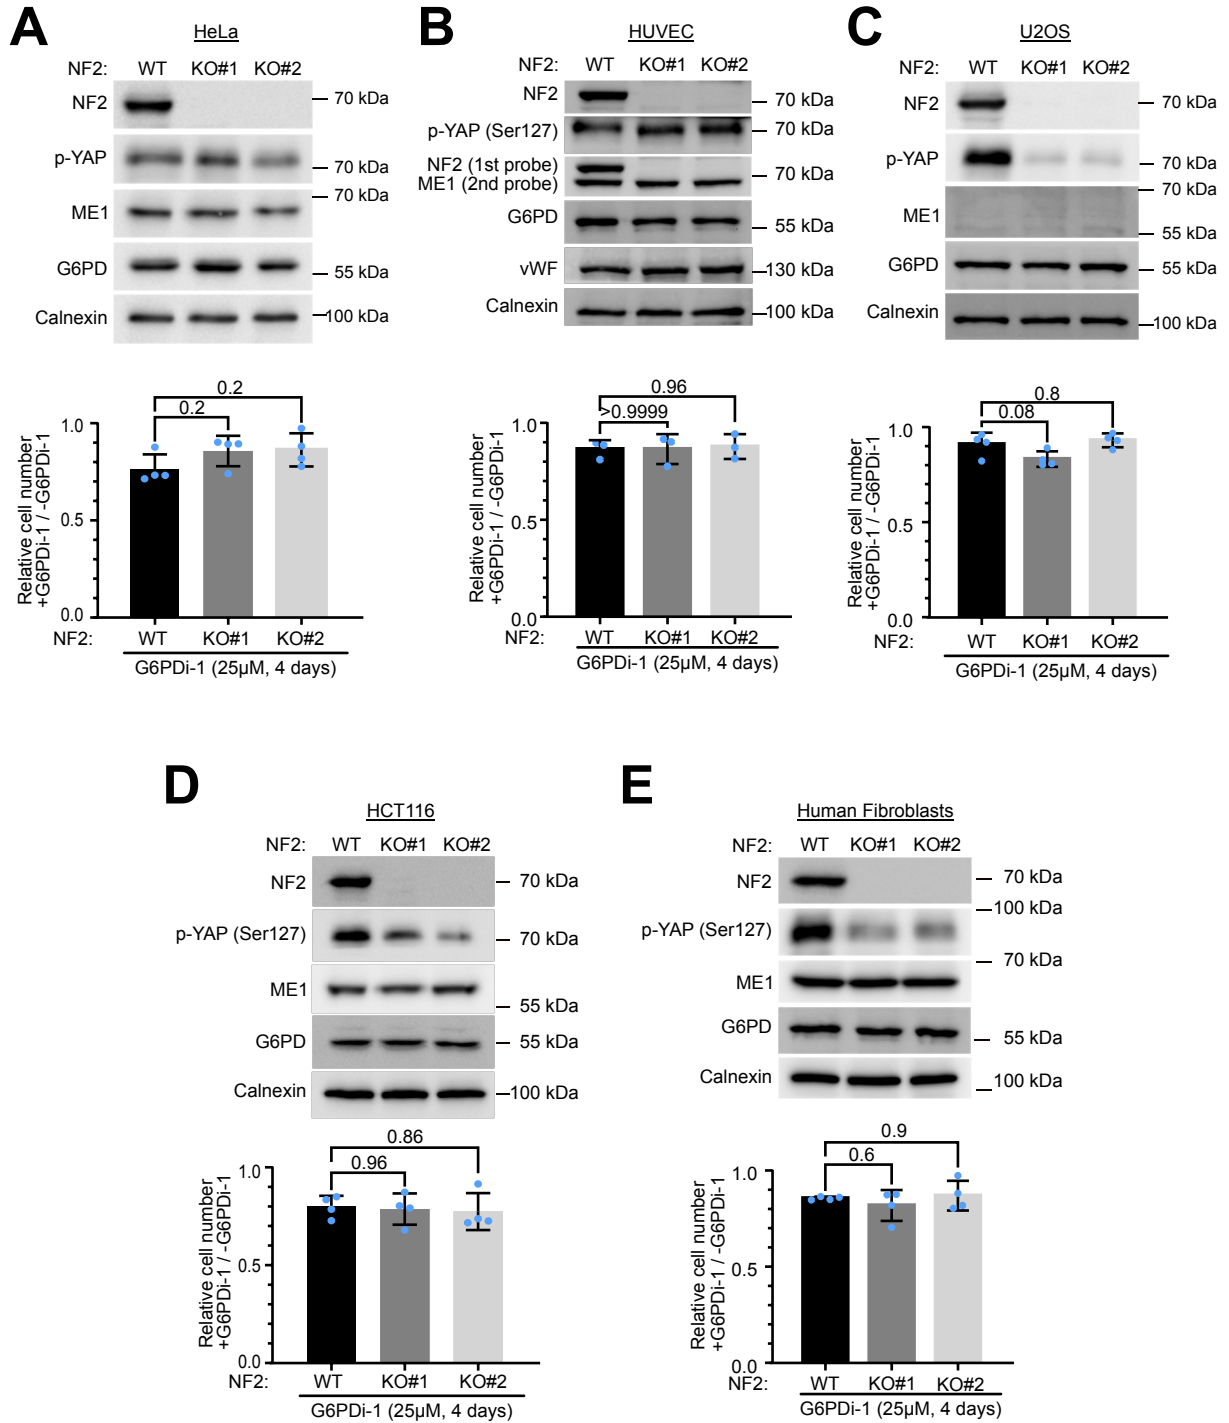

**Supplementary Figure 8: Synthetic lethality between NF2 and G6PD is not observed in other cell lines tested.**

NF2 was knocked-out in (A) HeLa cells, (B) immortalized human umbilical vein endothelial cells (HUVEC), (C) U2OS cells, (D) HCT116 cells and (E) immortalized human fibroblasts. Top panels show immuno-blot for the indicated proteins in each of the respective cell lines compared to the NF2-wildtype parental controls. Bottom panels show relative cell number quantified by CellTiter-Glo for cells treated + 25 $\mu$ M G6PDi-1 for 4 days, normalized cell treated without inhibitor for 4 days. Bars = mean  $\pm$  SD. n=4 (panels A, C, D, E) or 3 (panel B) biological replicates. Statistical analysis shown is a one-way ANOVA and Dunnett's multiple comparisons test.

Source data are provided as a Source Data file.

(Uncropped Immunoblots continue on next page)

**Uncropped Immunoblots  
of Supplementary Figures**

### Suppl. Figure 1 Panel B

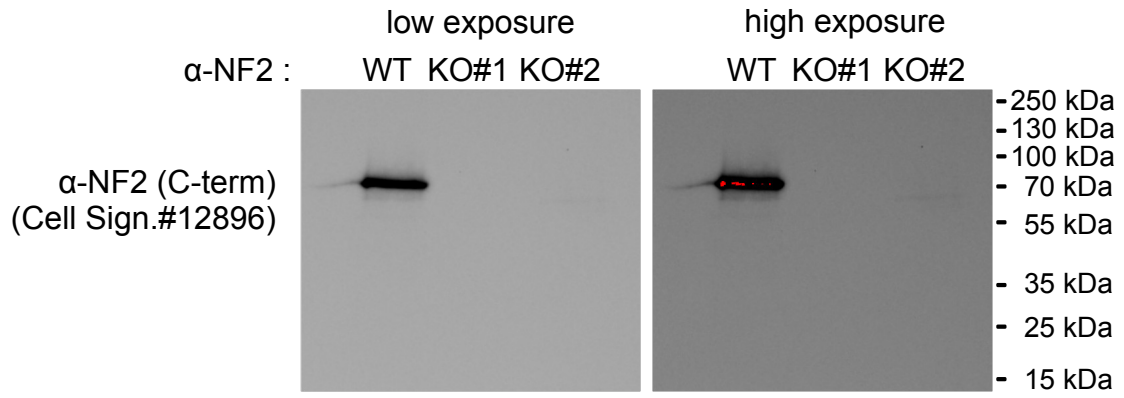

### ED Figure 1 Panel E

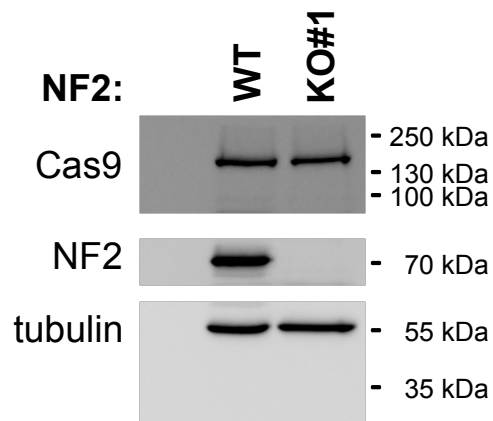

### Suppl. Figure 2 Panel B

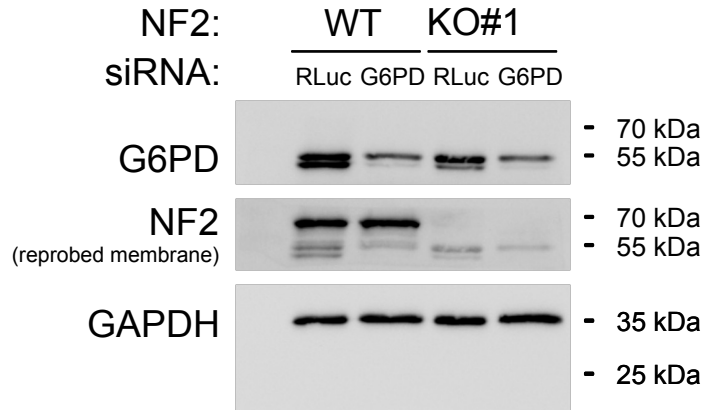

### ED Figure 2 Panel C

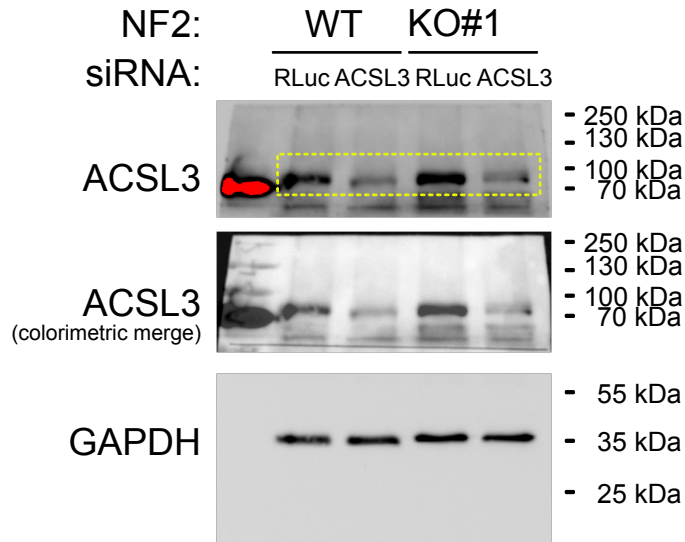

### Suppl. Fig. 2H

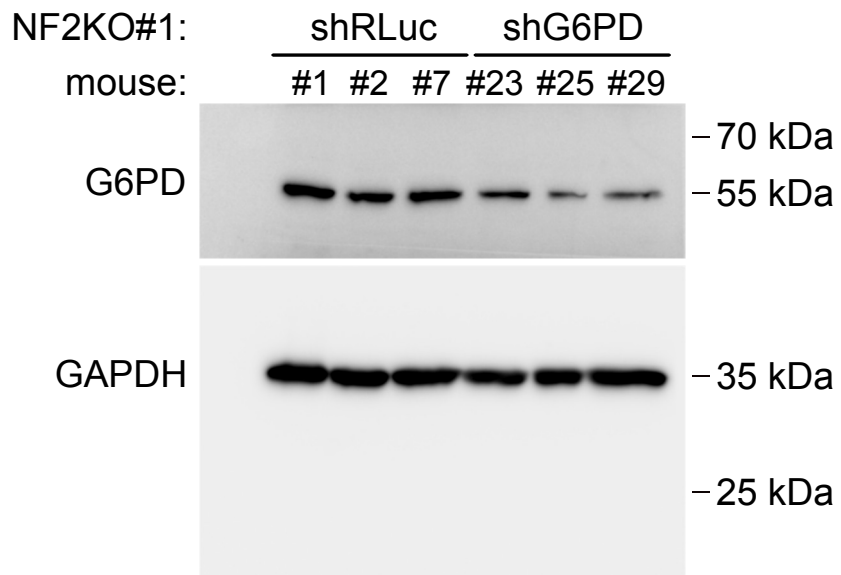



### Suppl. Figure 3 Panel A

ipn0.23 2λ

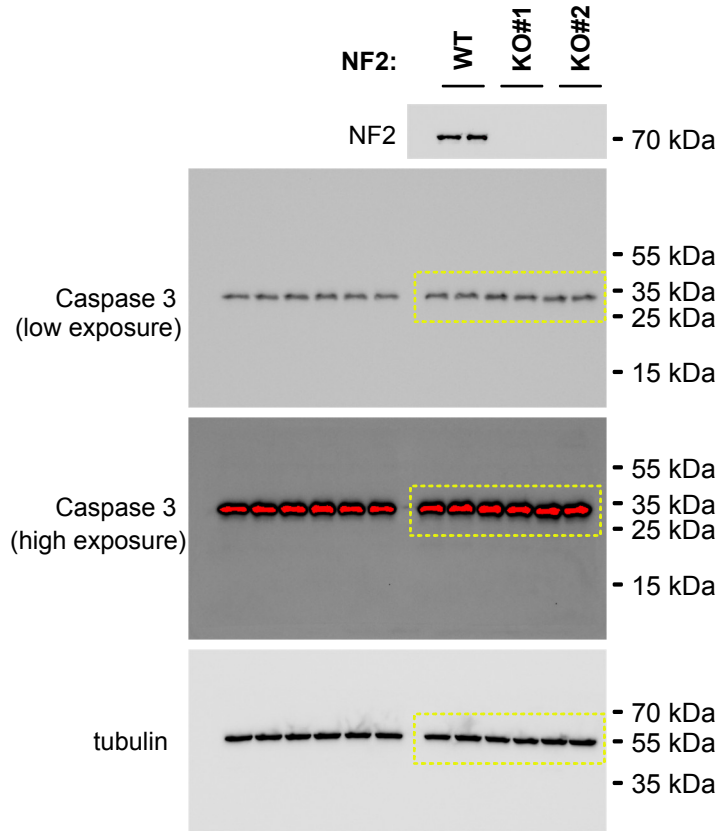

### ED Figure 3 Panel C

Emricasan treatment (Jurkat-6)

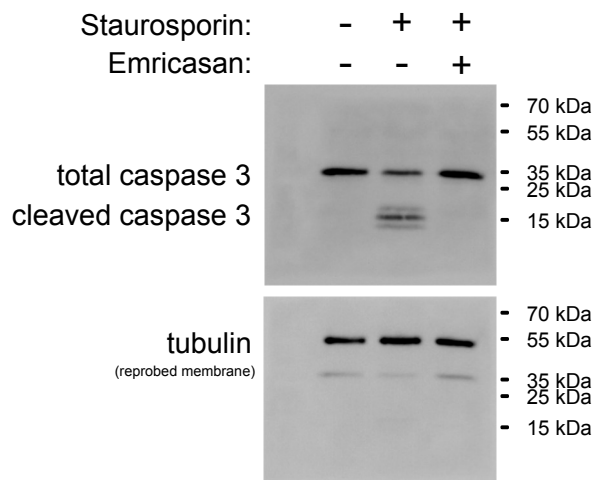



## Suppl. Figure 4 Panel A

### Creative Bioarrays:

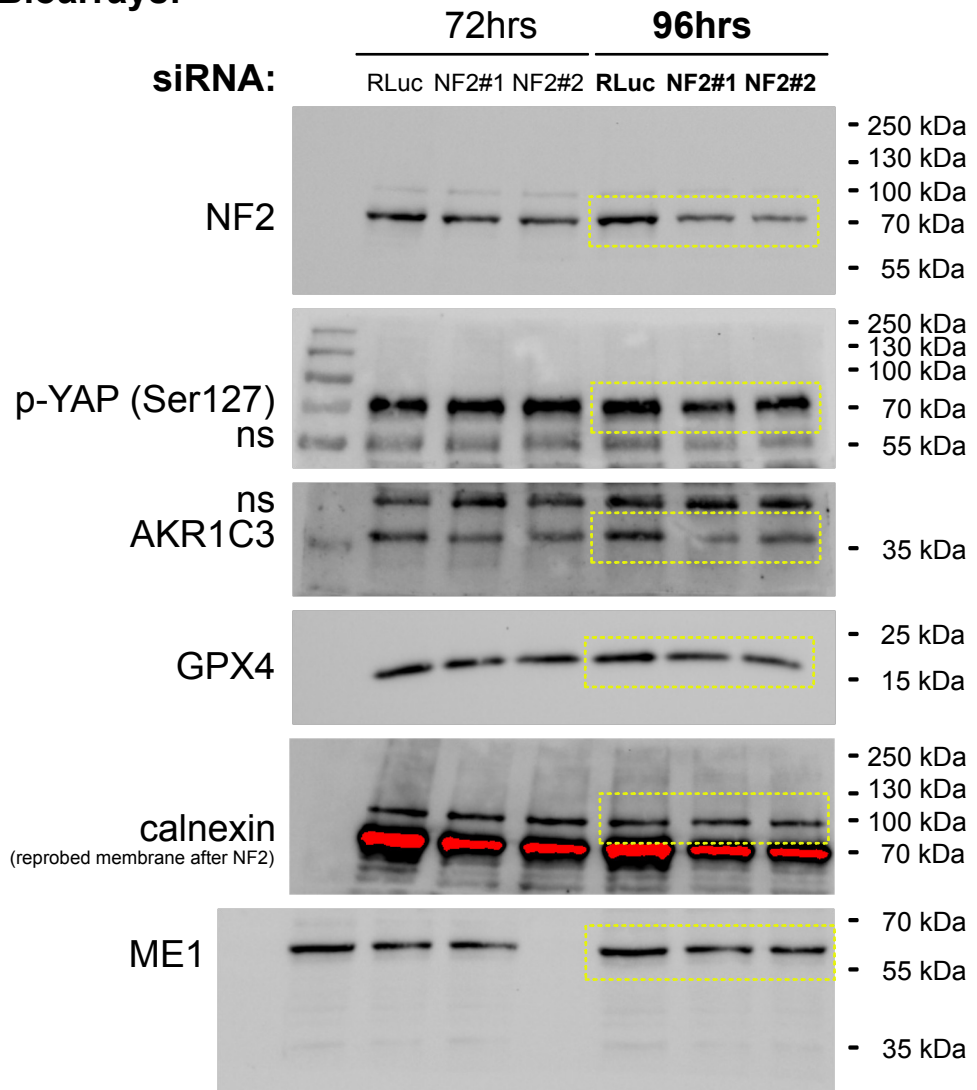

### Suppl. Figure 4 Panel B

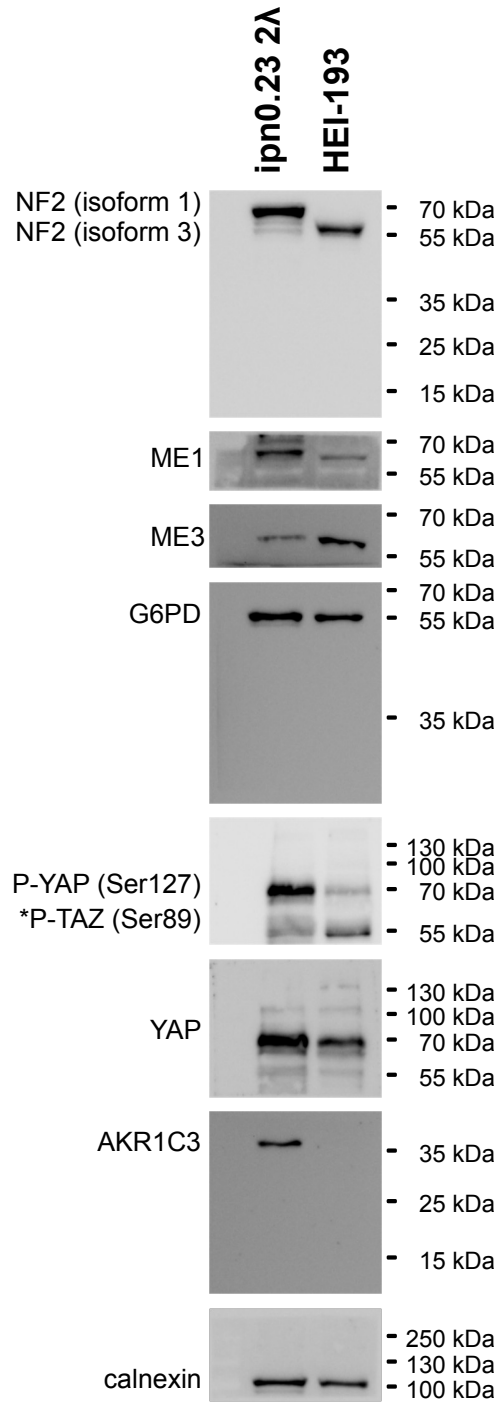

### Suppl. Fig. 6A

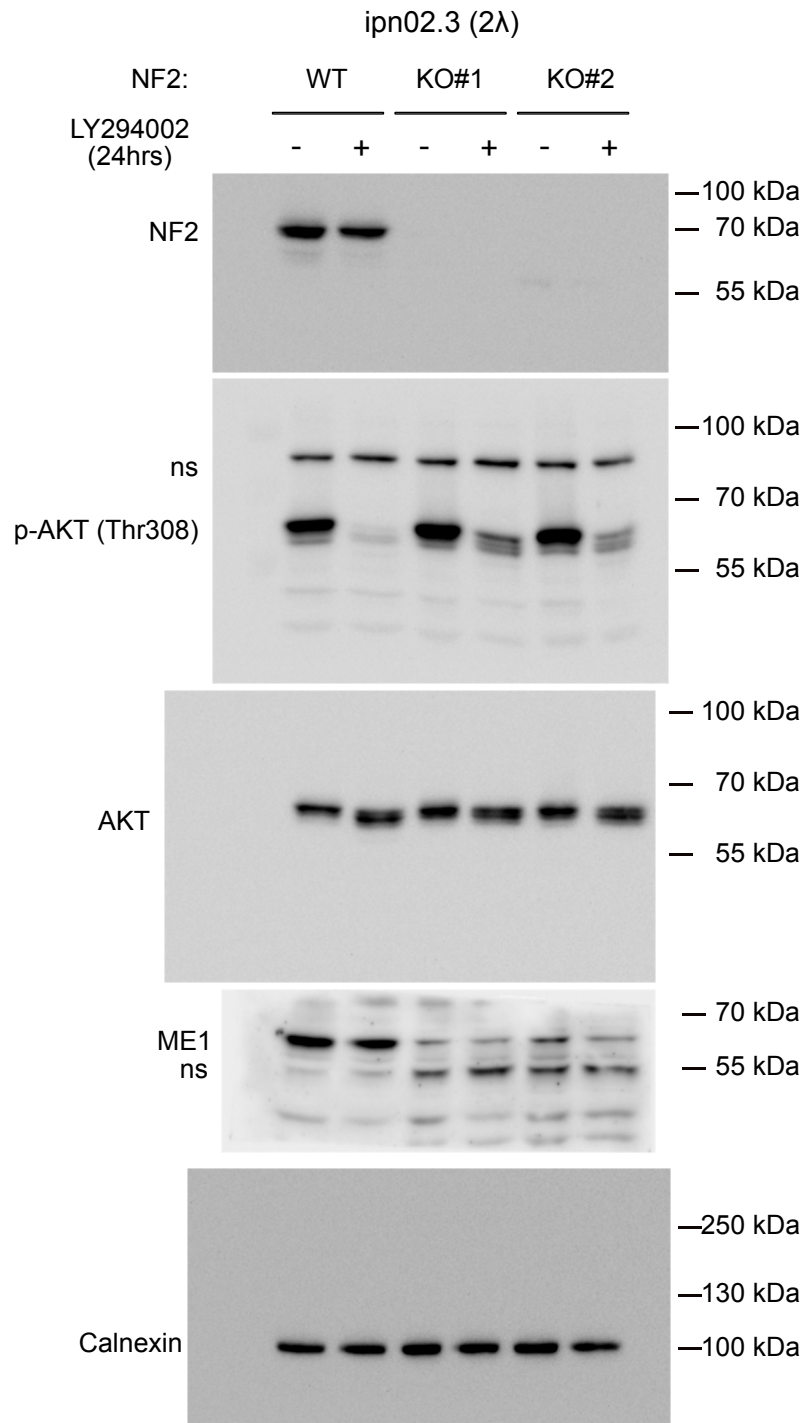

### Suppl. Figure 7 Panel A

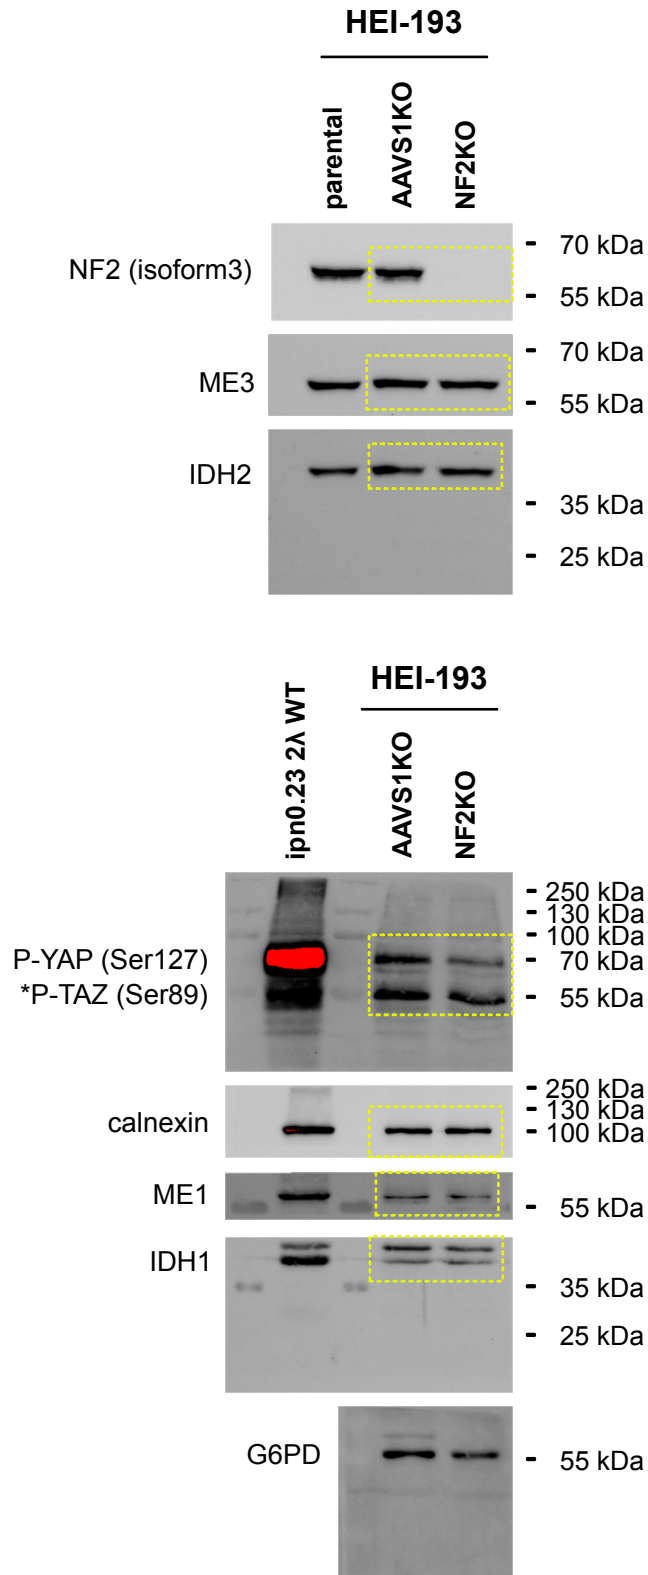

### Suppl. Figure 8 Panel A

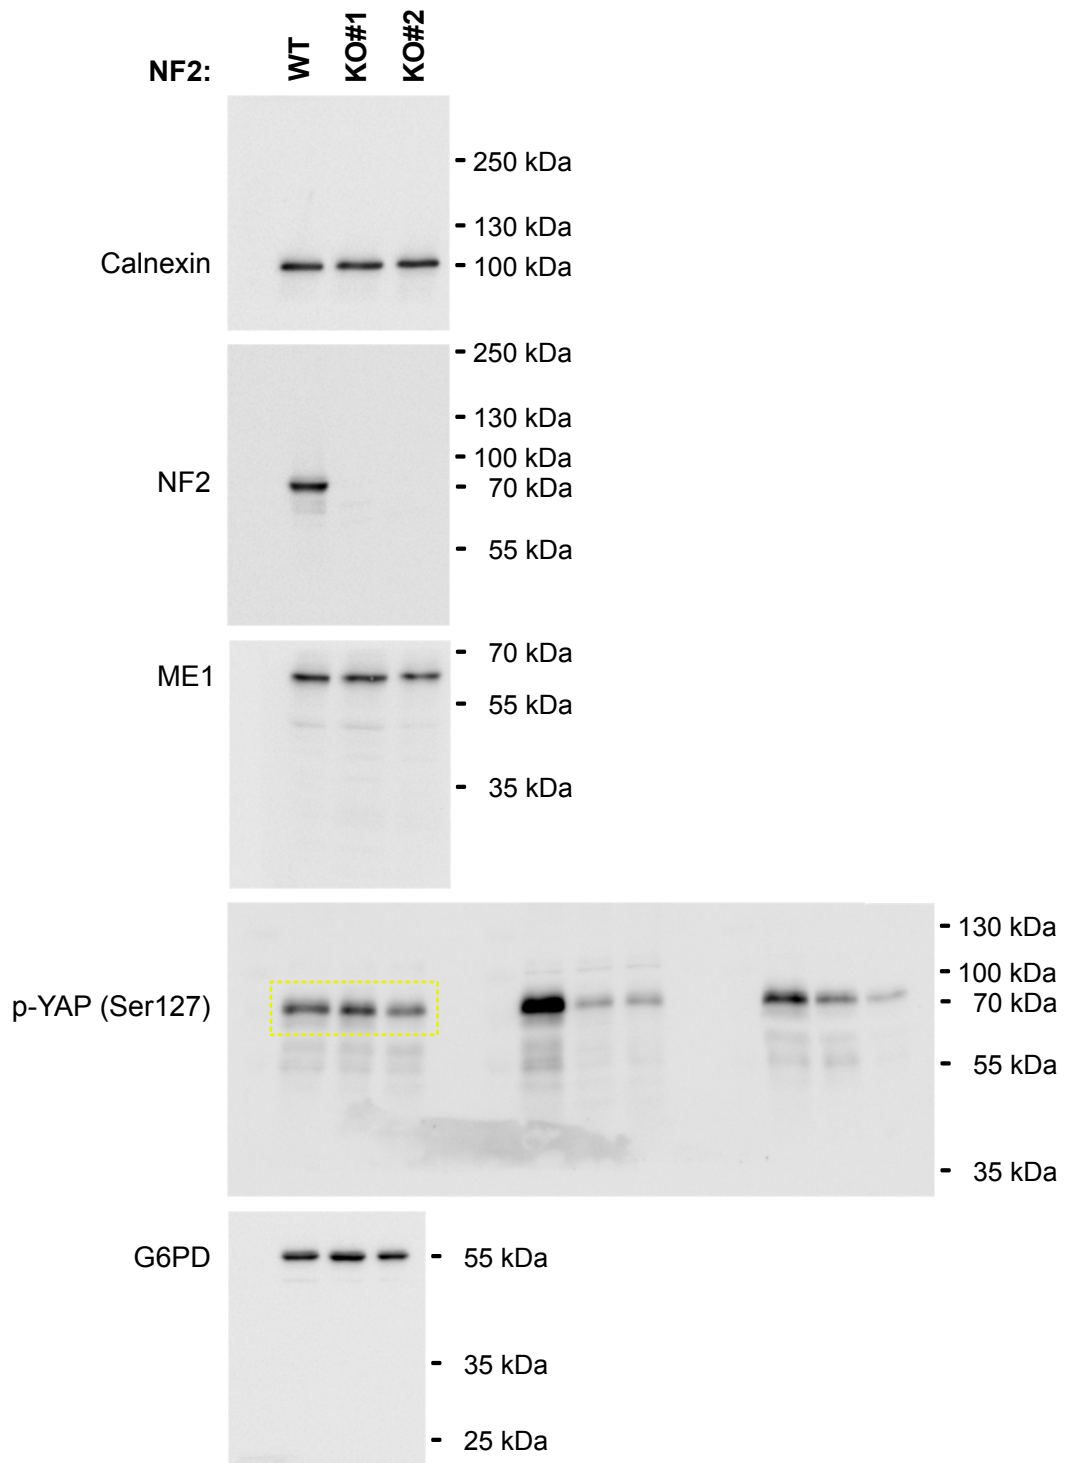

# Suppl. Figure 8 Panel B

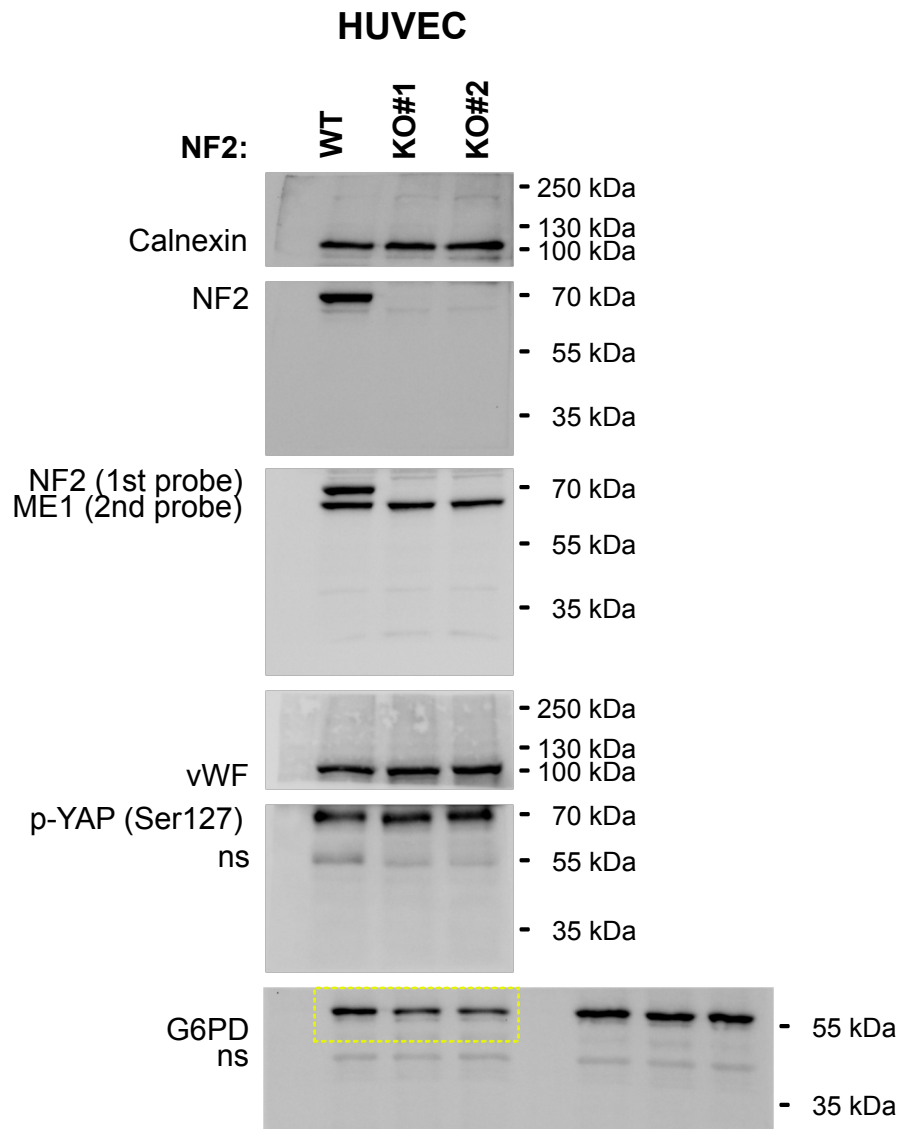

### Suppl. Figure 8 Panel C

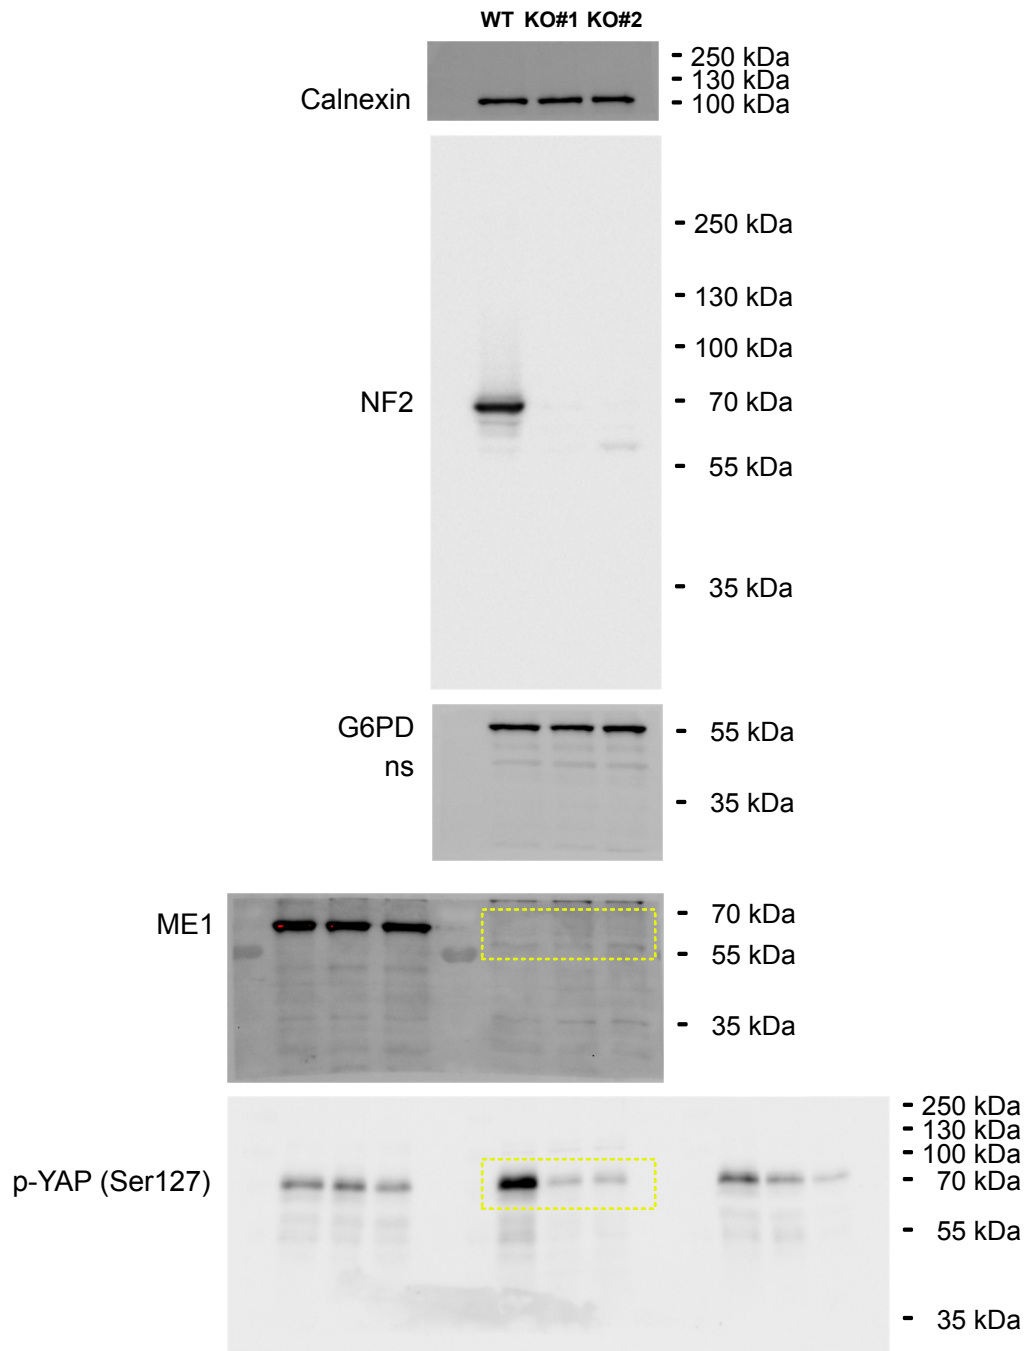

### Suppl. Figure 8 Panel D

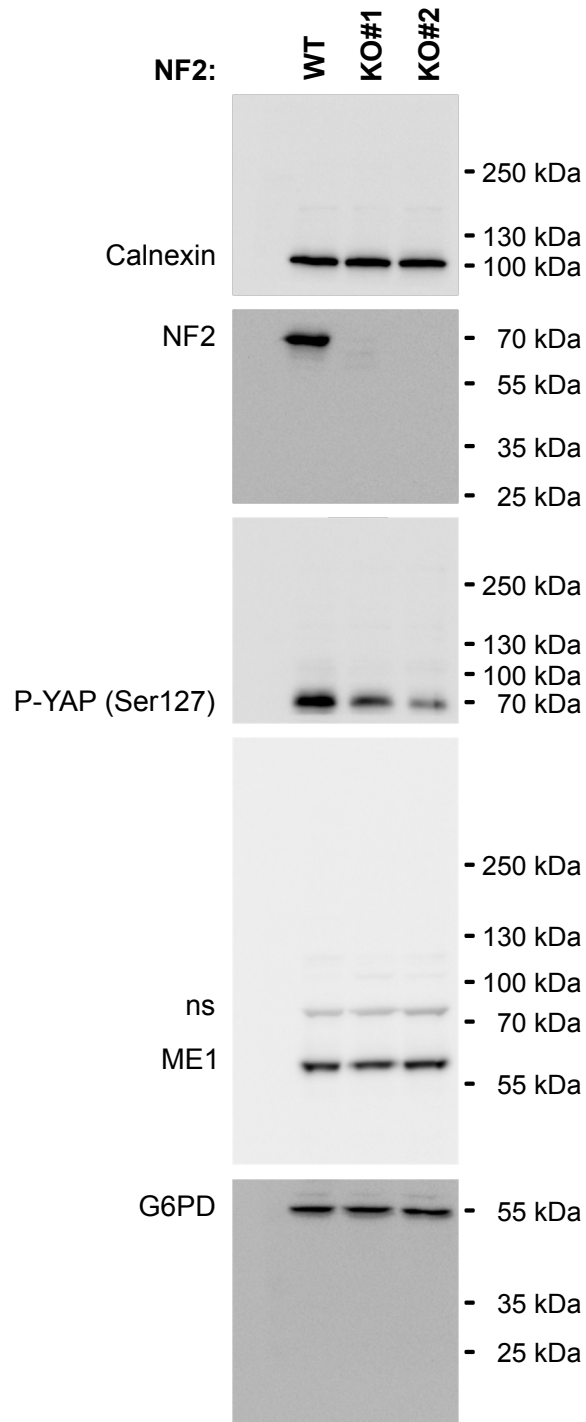



### Suppl. Figure 8 Panel E

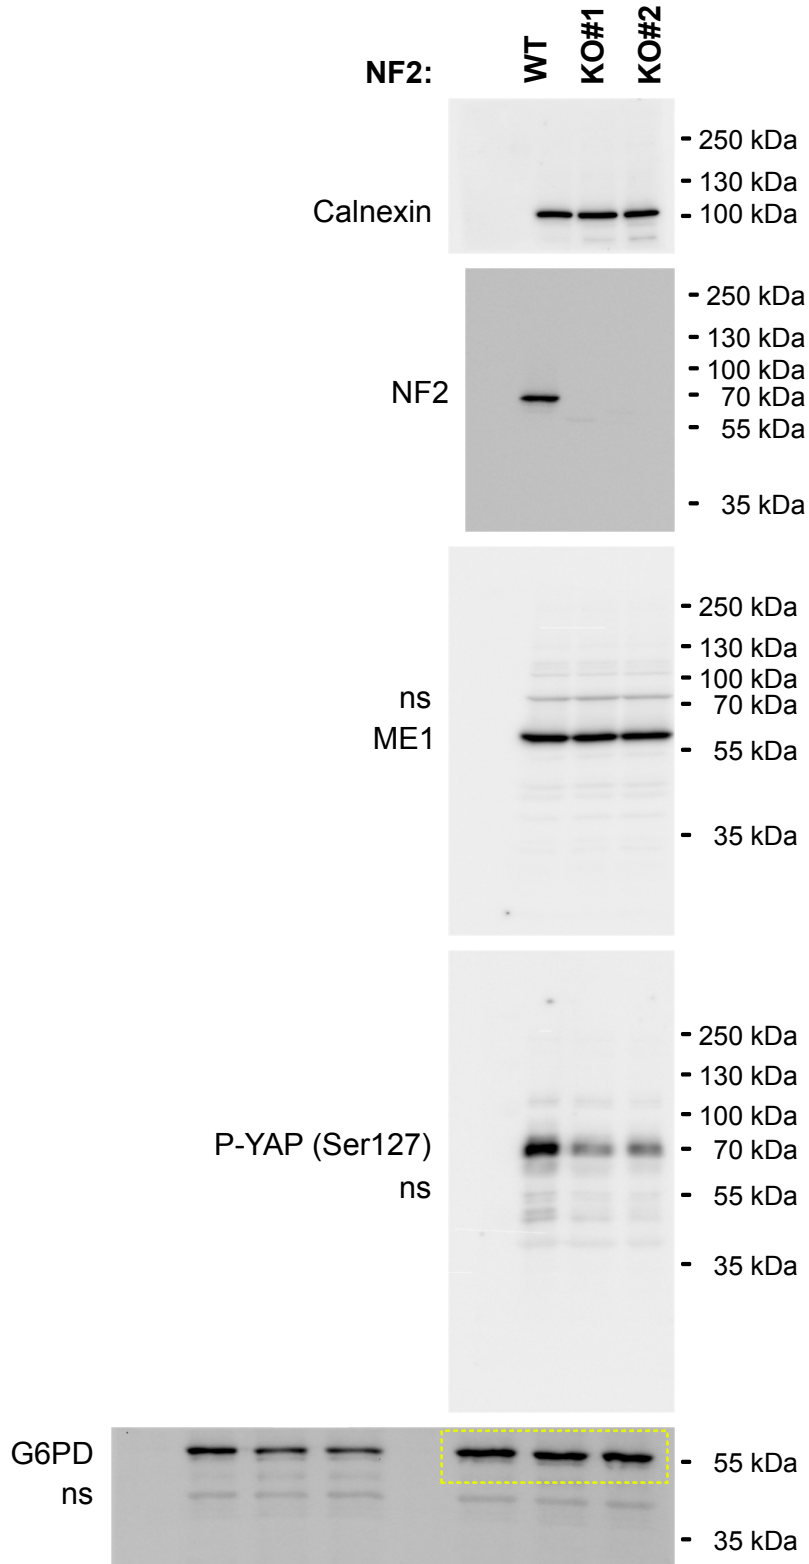

### Supplementary Information References

1. Ge SX, Jung D, Yao R. ShinyGO: a graphical gene-set enrichment tool for animals and plants. *Bioinformatics* **36**, 2628-2629 (2020).
2. Gugel I, *et al.* Contribution of mTOR and PTEN to Radioresistance in Sporadic and NF2-Associated Vestibular Schwannomas: A Microarray and Pathway Analysis. *Cancers* **12**, (2020).
3. Tsitsikov EN, *et al.* Specific gene expression signatures of low grade meningiomas. *Frontiers in oncology* **13**, 1126550 (2023).
4. Clark VE, *et al.* Genomic analysis of non-NF2 meningiomas reveals mutations in TRAF7, KLF4, AKT1, and SMO. *Science* **339**, 1077-1080 (2013).
